# Supplementary material
Source: PubMed Central journal article supplement (PMC2533771)
Supplement: supp_M801292200_human_beta1_GABA-A_homomeric_assembly_supplementary_files.pdf [file supp_M801292200_human_beta1_GABA-A_homomeric_assembly_supplementary_files.pdf]

**SUPPLEMENTARY TABLE**

| <b>construct</b>                              | <b>Expression</b> | <b>N</b> |
|-----------------------------------------------|-------------------|----------|
| <b>hβ1 ABCD regions</b>                       |                   |          |
| hβ1F                                          | 3.9 ± 3.8         | (109)    |
| hβ1F A                                        | 0.6 ± 1.0         | (3)      |
| hβ1F B                                        | 3.7 ± 2.8         | (3)      |
| hβ1F C                                        | 3.7 ± 2.8         | (7)      |
| hβ1F AB                                       | 1.4 ± 1.9         | (4)      |
| hβ1F ABC                                      | 2.3               | (1)      |
| hβ1F ABCD                                     | 3.3 ± 10.2        | (11)     |
| <b>Mode 1</b>                                 |                   |          |
| hβ1F* (D37C, R41N)                            | 78.2 ± 17.5       | (6)      |
| X2F hβ3/hβ1* (D37C, R41N)                     | 89.2 ± 27.3       | (3)      |
| hβ1F (R41N)                                   | 2.9 ± 1.1         | (3)      |
| hβ1F (K68Q)                                   | 5.0 ± 4.8         | (3)      |
| hβ1F (K68L)                                   | 4.6               | (1)      |
| hβ1F (D37A, K68Q)                             | 46.1              | (1)      |
| hβ1myc (K68L)                                 | 11.9 ± 20.6       | (3)      |
| hβ1myc (K68Q)                                 | 0 ± 0             | (2)      |
| hβ1F (D37A, E165N)                            | 56.6 ± 11.9       | (4)      |
| hβ1F (T161E)                                  | 5.4 ± 7.8         | (4)      |
| hβ1F (T161A)                                  | 2.4 ± 1.4         | (4)      |
| hβ1F (K197A)                                  | 1.4 ± 1.5         | (3)      |
| hβ1F (K197E)                                  | 0.7 ± 0.0         | (3)      |
| hβ1F (K197N)                                  | 0.1 ± 0.1         | (3)      |
| hβ1F (T161A, K197N)                           | 6.4 ± 2.7         | (4)      |
| hβ1F (T161E, K197N)                           | 2.6 ± 0.6         | (2)      |
| <b>Mode 2</b>                                 |                   |          |
| X1F hβ1/hβ3                                   | 8.8 ± 4.0         | (5)      |
| X1F hβ1 (E5D, S7G)/hβ3                        | 9.8 ± 5.8         | (2)      |
| X1F hβ1 (T3V, E5D, S7G)/hβ3                   | 0.5 ± 0.5         | (3)      |
| X2F hβ3/hβ1*                                  | 16.0 ± 6.1        | (3)      |
| X2F hβ3/hβ1 ABCD                              | 10.6 ± 5.1        | (3)      |
| X1F hβ1 (S73A)/hβ3                            | 8.7 ± 5.7         | (3)      |
| X1F hβ1 (S66Y, K68R, S73A)/hβ3                | 35.8 ± 16.1       | (6)      |
| hβ1F (S66Y, K68R, S73A)                       | 0.9 ± 1.5         | (3)      |
| hβ1F (V44I, A45V, S66Y, K68R, N169R, E172D)   | 6.0 ± 6.4         | (12)     |
| hβ1F (V44I, S66Y, K68R, S73A, N169R)          | 3.5 ± 9.1         | (5)      |
| hβ1F (V44I, S66Y, K68R, N169R)                | 2.9 ± 2.6         | (3)      |
| hβ1F (V44I, K68R, N169R)                      | 2.1 ± 1.9         | (3)      |
| hβ1F (V44I, S66Y, N169R, E172D)               | 2.1               | (1)      |
| hβ1F (V44I, S66Y, K68R, N169R, E172D)         | 1.2 ± 0.7         | (4)      |
| hβ1F*(N169R)                                  | 0.2 ± 0.2         | (2)      |
| <b>Mode 3</b>                                 |                   |          |
| hβ1F (V44I, A45V, D190E, Y191H, K192R, M193L) | 13.6 ± 5.0        | (8)      |
| hβ1F (V44I) C                                 | 9.4 ± 4.1         | (4)      |

Supplementary Table. Additional homomeric assembly data describing the ABCD regions of loop 9 and 10 and modes 1 and 2. Data are expressed as in Table I. The Table predominantly presents results where little or no effect was observed.

## Supplementary Figures

### Supplementary Figure 1. Modeling of mode 1 assembly.

D37 is shown between K68 and E165 on flanking  $\beta$  sheets  $\beta 2$  and  $\beta 8$ . Mutating E165 to N resulted in expression while K68R did not. Modeling further identified residues near E165, however mutations to T161 and K197 individually or together did not result in assembly.

### Supplementary Figure 2. Modeling of mode 3 assembly.

A45V of the subunit contributing the minus side of the interface is shown in relationship to residue F105 and A135 of the plus subunit at the interface. Panel (A) illustrates h $\beta 1$  wild type while panel (B) shows A45V.

### Supplementary Figure 3. Summary of loop and $\beta$ sheet interactions at the plus and minus interfaces of adjacent subunits.

Each panel shows a map for one construct; the name and relative expression of the construct are shown at the top of each panel. In each panel, the plus face (left) and minus face (right) are shown for a homomeric pair of subunits. The regions from each subunit which can contribute to interactions across the interface are shown from top to bottom on the respective sides, with b1 indicating  $\beta$  sheet 1 and l2 indicating loop 2. When the name of the region is *italicized*, it indicates that the region differs from that of wild type  $\beta 3$ , while when the region is in **bold type** it indicates that the region has been mutated in the construct.

The structure at the interaction is indicated by the following notations: \*\*\* with yellow shading indicates regions like  $\beta 3$  in the wild type subunit; ~ with no shading regions different from  $\beta 3$ ; ++ with green shading regions mutated to be like  $\beta 3$ ; and xx with blue shading regions of  $\beta 3$  mutated to reduce expression. Panel A1 also shows the locations of residues and regions examined in this study, for example 45 indicates residue 45 and A the A region. This figure summarizes the data suggesting that  $\beta$  sheets 1 and 2, and loops 9 and 10 contribute strongly to assembly.

The top row (A1-A4) shows wild-type  $\beta 1$  and  $\beta 2$  subunits, then constructs which reduced expression of  $\beta 3$  or enhanced expression of  $\beta 2$ . The bottom row shows constructs which enhanced expression of  $\beta 1$ , including examples of mode 2 (B1, B2) and mode 3 (B3, B4). Note that mode 1 assembly is not shown in this figure.

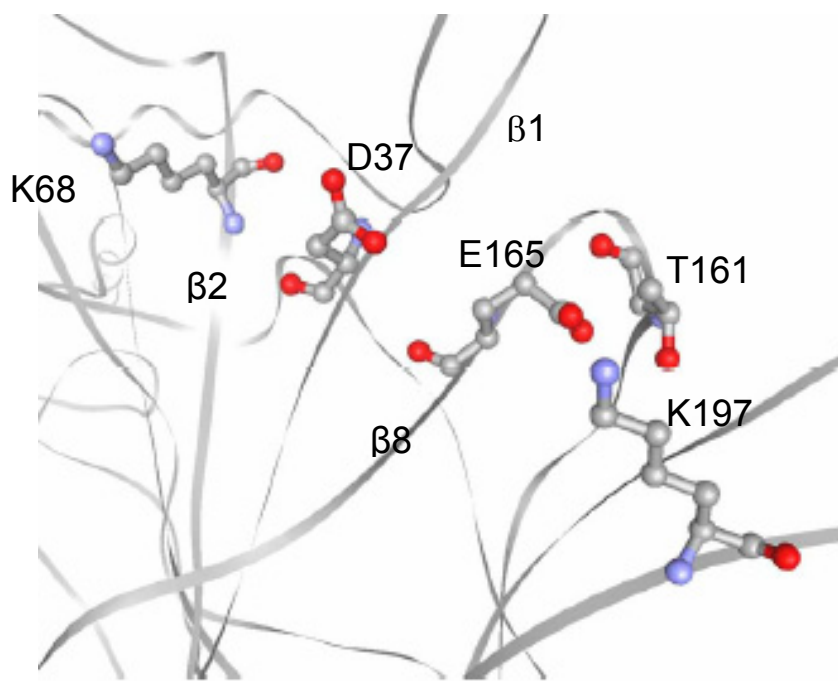

**Supplementary Figure 1.**

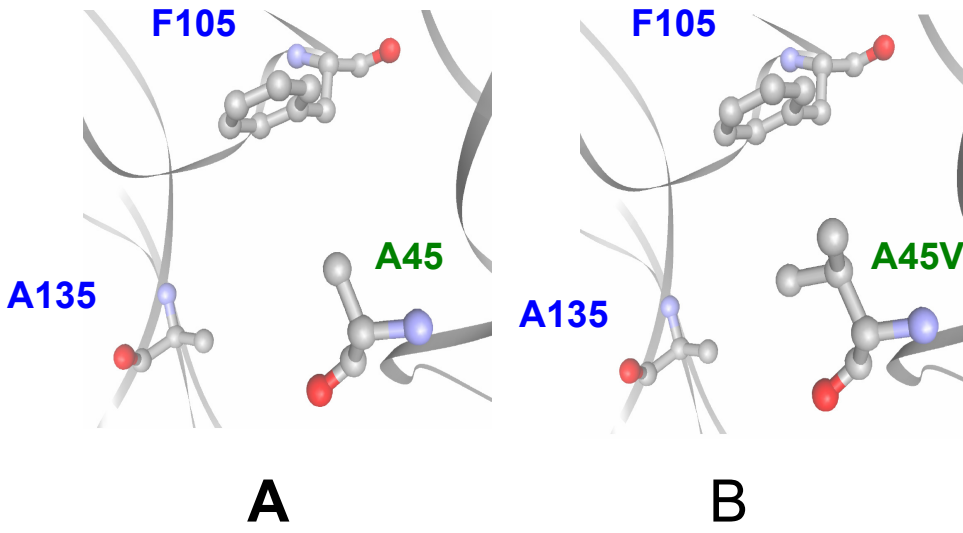

Supplementary Figure 2

**A1**

hβ1

4%

|    |     |      |
|----|-----|------|
| 11 | ~   | a1   |
| 11 | *** | b3   |
| 12 | ~   | /9   |
| 14 | *** | b5   |
| 15 | ~   | b1   |
| 15 | *** | b5   |
| 15 | *** | b6   |
| 17 | ~   | b1   |
| 17 | ~   | /9   |
| 18 | ~   | a1   |
| 18 | ~   | b2   |
| 18 | *** | b3   |
| 18 | *** | b5   |
| 18 | *** | b6   |
| D  | /10 | ~ /9 |

(Plus face) (Minus face)

**A2**

mβ2

6%

|     |     |    |
|-----|-----|----|
| 11  | ~   | a1 |
| 11  | *** | b3 |
| 12  | ~   | /9 |
| 14  | *** | b5 |
| 15  | *** | b1 |
| 15  | *** | b5 |
| 15  | *** | b6 |
| 17  | *** | b1 |
| 17  | ~   | /9 |
| 18  | ~   | a1 |
| 18  | ~   | b2 |
| 18  | *** | b3 |
| 18  | *** | b5 |
| 18  | *** | b6 |
| 110 | ~   | /9 |

**A3**

hβ3 (V45A, DTNK)

13%

|     |     |    |
|-----|-----|----|
| 11  | *** | a1 |
| 11  | *** | b3 |
| 12  | XX  | /9 |
| 14  | *** | b5 |
| 15  | XX  | b1 |
| 15  | *** | b5 |
| 15  | *** | b6 |
| 17  | XX  | b1 |
| 17  | XX  | /9 |
| 18  | *** | a1 |
| 18  | *** | b2 |
| 18  | *** | b3 |
| 18  | *** | b5 |
| 18  | *** | b6 |
| 110 | XX  | /9 |

**A4**

mβ2 GKER

20%

|     |     |    |
|-----|-----|----|
| 11  | ~   | a1 |
| 11  | *** | b3 |
| 12  | ++  | /9 |
| 14  | *** | b5 |
| 15  | *** | b1 |
| 15  | *** | b5 |
| 15  | *** | b6 |
| 17  | *** | b1 |
| 17  | ++  | /9 |
| 18  | ~   | a1 |
| 18  | ~   | b2 |
| 18  | *** | b3 |
| 18  | *** | b5 |
| 18  | *** | b6 |
| 110 | ++  | /9 |

**B1**

X3 hβ1 (S66Y, K68R, S73A) / hβ3

36%

|     |     |    |
|-----|-----|----|
| 11  | ~   | a1 |
| 11  | *** | b3 |
| 12  | ++  | /9 |
| 14  | *** | b5 |
| 15  | ~   | b1 |
| 15  | *** | b5 |
| 15  | *** | b6 |
| 17  | ~   | b1 |
| 17  | ++  | /9 |
| 18  | ~   | a1 |
| 18  | ~   | b2 |
| 18  | *** | b3 |
| 18  | *** | b5 |
| 18  | *** | b6 |
| 110 | ++  | /9 |

**B2**

hβ1\* AB

61%

|     |     |    |
|-----|-----|----|
| 11  | ~   | a1 |
| 11  | *** | b3 |
| 12  | ++  | /9 |
| 14  | *** | b5 |
| 15  | ++  | b1 |
| 15  | *** | b5 |
| 15  | *** | b6 |
| 17  | ++  | b1 |
| 17  | ++  | /9 |
| 18  | ~   | a1 |
| 18  | ++  | b2 |
| 18  | *** | b3 |
| 18  | *** | b5 |
| 18  | *** | b6 |
| 110 | ++  | /9 |

**B3**

X3 hβ1 (V44I, A45V) / hβ3

52%

|     |     |    |
|-----|-----|----|
| 11  | ~   | a1 |
| 11  | *** | b3 |
| 12  | ++  | /9 |
| 14  | *** | b5 |
| 15  | ++  | b1 |
| 15  | *** | b5 |
| 15  | *** | b6 |
| 17  | ++  | b1 |
| 17  | ++  | /9 |
| 18  | ~   | a1 |
| 18  | ~   | b2 |
| 18  | *** | b3 |
| 18  | *** | b5 |
| 18  | *** | b6 |
| 110 | ++  | /9 |

**B4**

hβ1 (A45V, K196R)

43%

|     |     |    |
|-----|-----|----|
| 11  | ~   | a1 |
| 11  | *** | b3 |
| 12  | ~   | /9 |
| 14  | *** | b5 |
| 15  | ++  | b1 |
| 15  | *** | b5 |
| 15  | *** | b6 |
| 17  | ++  | b1 |
| 17  | ~   | /9 |
| 18  | ~   | a1 |
| 18  | ~   | b2 |
| 18  | *** | b3 |
| 18  | *** | b5 |
| 18  | *** | b6 |
| 110 | ++  | /9 |
